# Supplementary material for: Facile fabrication of magnetically separable graphitic carbon nitride photocatalysts with enhanced photocatalytic activity under visible light
Source: Royal Society of Chemistry journal article supplement (doi:10.1039/c2ta01069k), 2013-01-01
Supplement: c2ta01069k.pdf [file c2ta01069k.pdf]

Electronic Supplementary Information for

**Facile fabrication of magnetically separable graphitic carbon nitride photocatalysts with enhanced photocatalytic activity under visible light**

**Sheng Ye,<sup>a</sup> Ling-Guang Qiu,<sup>\*a</sup> Yu-Peng Yuan,<sup>a</sup> Yu-Jun Zhu,<sup>a</sup> Jiang Xia<sup>a</sup> and Jun-Fa Zhu<sup>b</sup>**

<sup>a</sup>Laboratory of Advanced Porous Materials, School of Chemistry and Chemical Engineering, Anhui University, Hefei 230039, China.

<sup>b</sup>National Synchrotron Radiation Laboratory, University of Science and Technology of China, Hefei 230029, China.

---

\* Corresponding author

Fax: 86-551-5108212; Tel.: 86-551-5108212;

E-mail: lgqiu@ahu.edu.cn (L.-G. Qiu)

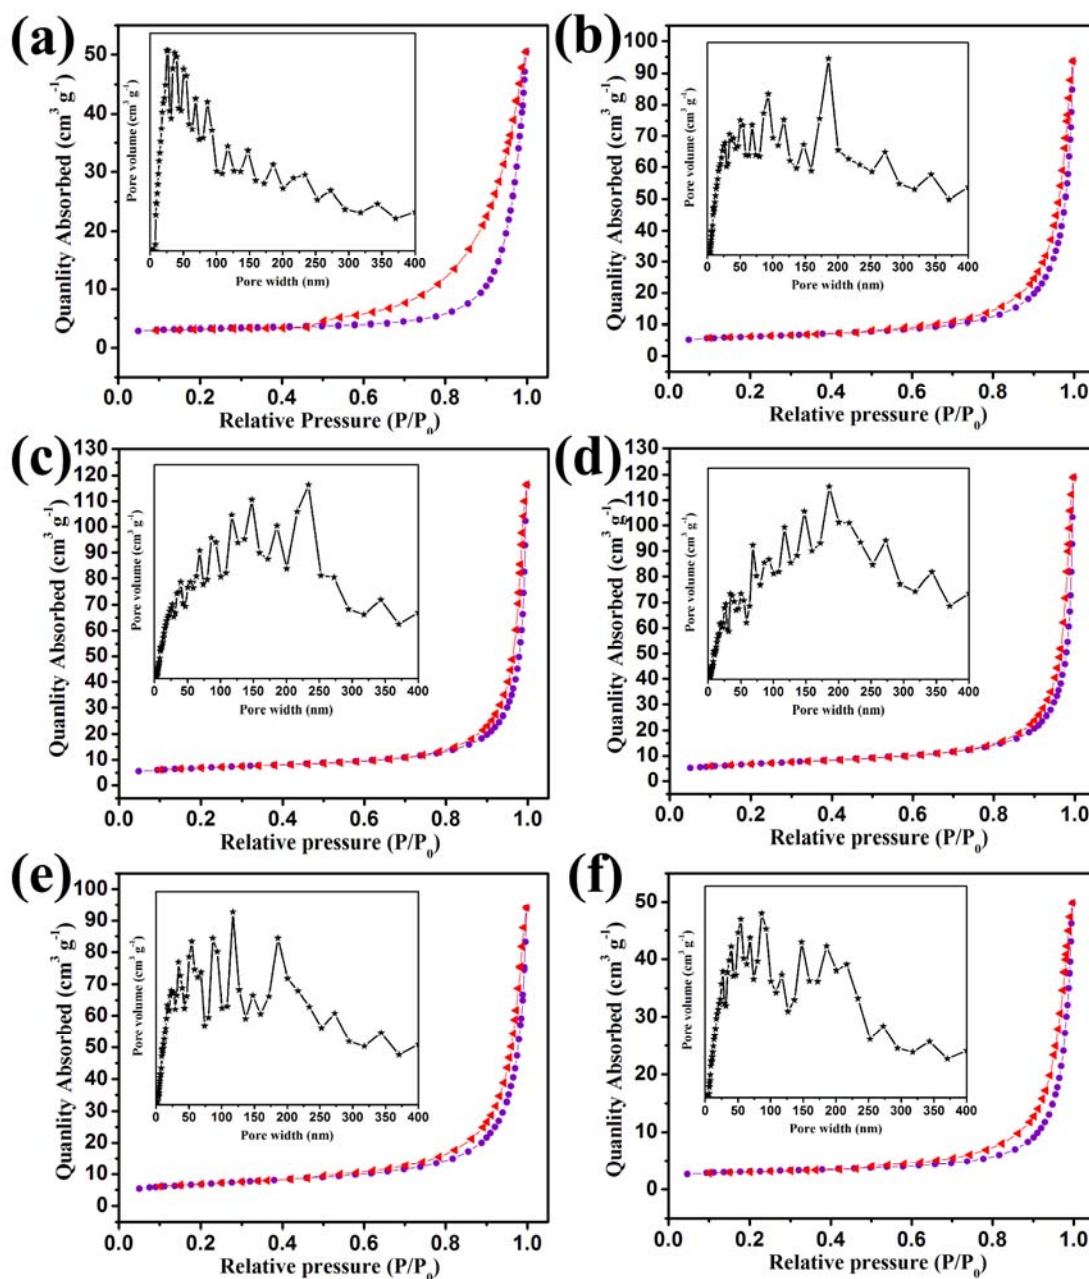

**Figure S1.**  $N_2$  sorption–desorption isotherms of the as-prepared (a) pure  $g-C_3N_4$  and (b-f)  $Fe_2O_3/g-C_3N_4$  composite photocatalysts **1-5** measured at 77K. The inset shows corresponding pore size distribution analysis obtained using the density functional theory (DFT).

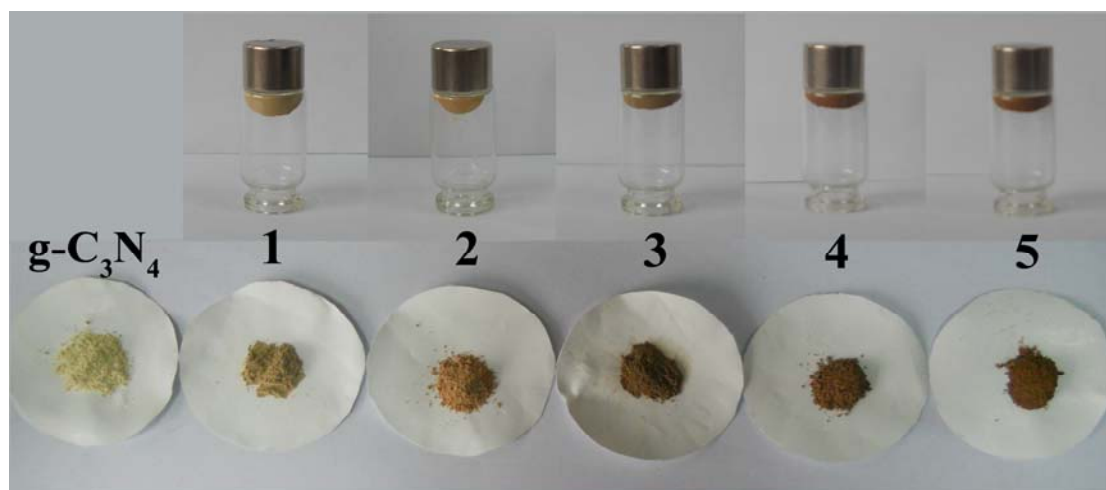

**Figure S2.** Magnetic separation property of the as-prepared  $Fe_2O_3/g-C_3N_4$  composite photocatalysts 1-5 under an external magnetic field compared with pure  $g-C_3N_4$ .

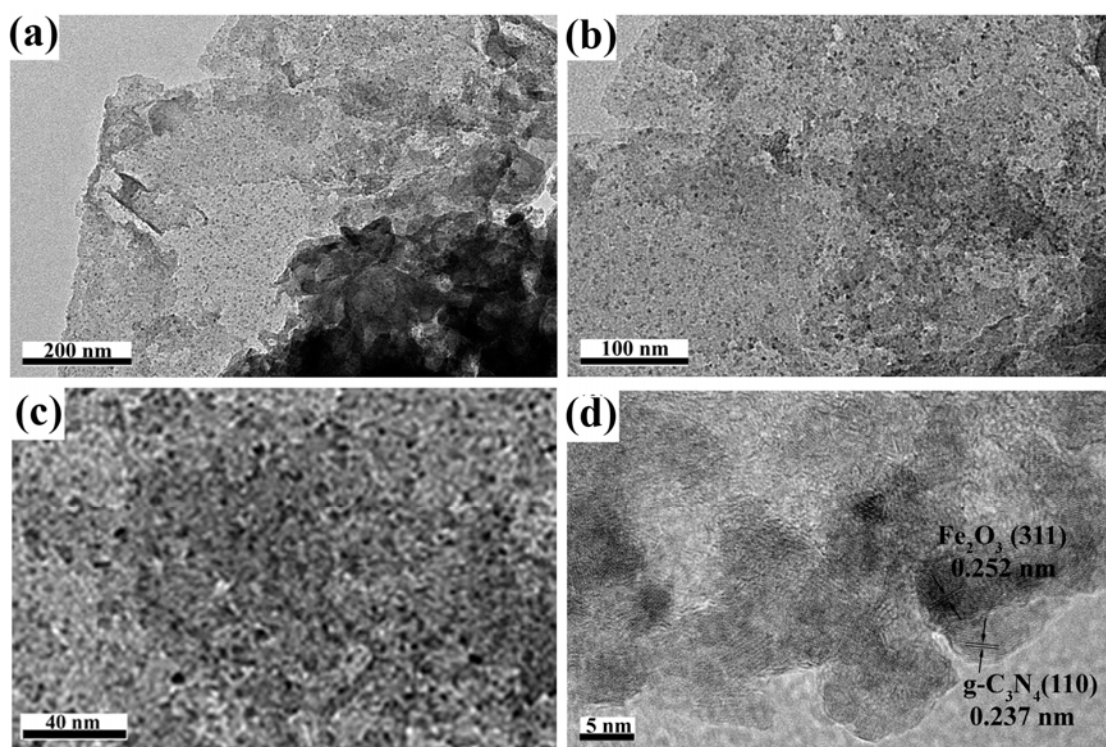

**Figure S3.** TEM images and high-resolution TEM images of the representative  $Fe_2O_3/g-C_3N_4$  composite photocatalysts after the reaction.
